# Supplementary material for: Establishing company level fishing revenue and profit losses from fisheries: A bottom-up approach
Source: PLoS One. 2018 Nov 20;13(11):e0207768. doi: 10.1371/journal.pone.0207768 (PMC6245793; doi:10.1371/journal.pone.0207768)
Supplement: S1 File — (XLSX) [file pone.0207768.s007.xlsx]

## Sheet: Info
Supplementary data accompanying "Establishing company level fishing revenue and profit losses from fisheries: A bottom-up approach"
By: Tim Cashion, Santiago de la Puente, Dyhia Belhabib, Daniel Pauly, Dirk Zeller, and U. Rashid Sumaila
Data compiled by Tim Cashion
Date: 08/11/2018
Any additional data requests can be addressed to t.cashion@oceans.ubc.ca
Sheet	Description
NorthCentralAnchoveta_Opt_F	Scenario analysis data for the North-Central anchoveta stock modeled for Optimal-F scenario
SouthernAnchoveta_Opt_F	Scenario analysis data for the Southern anchoveta stock modeled for Optimal-F scenario
NorthCentralAnchoveta_PGY	Scenario analysis data for the North-Central anchoveta stock modeled for PGY scenario
SouthernAnchoveta_PGY	Scenario analysis data for the Southern anchoveta stock modeled for PGY scenario
Figure2Data	Data requried to re-create the six panel plots in Figure 2
CMSY_Output	Raw output of CMSY method for the four stocks analyzed
PriceElasticity	Data used for price elasticity regression

## Sheet: NorthCentralAnchoveta_Opt_F
r	1.29583		Year	ObsB	ObsC	PredB1	Rec_A	Dev	Dev2	Fmsy	PredBcorr	PrecC	%DIFF	DIFF
K	19377.8		2000	9086.39	9110	9086.39	1	0	0	0.647915	9086.39	5364.66	1.0026	-3745.34
Fmsy	0.647915		2001	10951.2	5960	10951.2	1.75504	0.00694763	4.82695e-05	0.647915	9975.05	5940.43	0.54423	-19.5668
SS	0.000351904		2002	10627.9	6720	10627.9	0.913401	0.00516324	2.66591e-05	0.647915	15042.5	9223.68	0.6323	2503.68
B_Rem	806.517		2003	9937.58	5130	9937.58	0.969619	0.00594054	3.529e-05	0.647915	9802.13	5828.4	0.516222	698.398
			2004	10703.9	8070	10703.9	0.939878	0.00587162	3.44759e-05	0.647915	10059.8	5995.33	0.753933	-2074.67
			2005	10606.2	7570	10606.2	1.28406	0.00675627	4.56471e-05	0.647915	9955.97	5928.07	0.713733	-1641.93
			2006	9680.65	5000	9680.64	1.06801	0.00663021	4.39596e-05	0.647915	12082.6	7305.92	0.516494	2305.92
			2007	8737.15	5140	8737.15	0.646188	0.00400384	1.60308e-05	0.521863	11072	5357.16	0.588293	217.161
			2008	8653.63	5300	8653.62	0.813328	0.00386894	1.49687e-05	0.574836	9688.65	5105.77	0.61246	-194.228
			2009	8444.82	5260	8444.81	0.820376	0.0038648	1.49367e-05	0.57971	9688.62	5149.05	0.622867	-110.955
			2010	8195.04	3020	8195.04	0.811491	0.00358916	1.2882e-05	0.573395	9689.56	5093.49	0.368516	2073.49
			2011	8996.2	6310	8996.2	0.623521	0.00160876	2.58812e-06	0.45442	9690.28	4036.96	0.701407	-2273.04
			2012	9030.93	3330	9030.92	1.01589	0.00635887	4.04352e-05	0.647915	9567.53	5676.39	0.368733	2346.39
			2013	9288.69	4500	9288.69	0.574167	0.00218209	4.7615e-06	0.440795	10267.5	4170.33	0.48446	-329.67
			2014	7907.08	1920	7907.08	0.497598	0.00259577	6.73803e-06	0.351497	9688.66	3122.05	0.24282	1202.05
			2015	8331.51	3340	8331.51	0.386533	0.00206449	4.26211e-06	0.426091	9690.33	3785.31	0.400888	445.313
						7370.38	0.386533				8331.51			1403
				9323.68	5355						10315.5	5442.69
			Coefficient of Variability	0.105396	0.360487					Coefficient of Variability	0.139448	0.263373
			Min	7907.08	1920					Min	9086.39	3122.05
			Max	10951.2	9110					Max	15042.5	9223.68
			STDEV	982.677	1930.41					STDEV	1438.47	1433.46
			95% CI	481.512	945.899					95% CI	704.849	702.394
			Mean (2000-2010)	9602.22	6025.45					Mean (2000-2010)	10558.5	6026.54
			Mean (2011-2015)	8710.88	3880					Mean (2011-2015)	9780.85	4158.21
			Mean (2000-2015)	9323.68	5355					Mean (2000-2015)	10315.5	5442.69

## Sheet: SouthernAnchoveta_Opt_F
r	1.16968		Year	ObsB	ObsC	PredB1	Recruitment_Anomaly	Error	Error^2	Fmsy	ScenarioB	ScenarioC	%DIFF	DIFF
K	2705.02		2000	2777.36	1594.36	2777.36	1	0	0	0.60263	2777.36	1673.72	0.574054	79.3643
Fmsy	0.584841		2001	3108.44	1134.18	3108.44	1.08959	0.00182318	3.32399e-06	0.608058	2870.77	1745.59	0.364871	611.414
SS	2.8004e-05		2002	3346.72	2842.46	3346.72	0.778513	0.00121139	1.46748e-06	0.551342	3054.37	1684	0.849327	-1158.45
B_Rem	78.9287		2003	3191.72	869.545	3191.72	1.55204	0.00117099	1.37123e-06	0.608058	2745.79	1669.6	0.272438	800.053
			2004	3327.45	2192.76	3327.45	0.572923	0.000170225	2.89765e-08	0.509652	3815.76	1944.71	0.658991	-248.054
			2005	3044.33	2400.22	3044.33	1.10067	0.00172816	2.98655e-06	0.608058	2788.05	1695.3	0.788423	-704.923
			2006	2925.99	1779.67	2925.99	1.29116	0.00191994	3.68618e-06	0.608058	3038.42	1847.53	0.608228	67.868
			2007	2531.86	2069.82	2531.86	0.782396	0.00220166	4.84732e-06	0.545602	3473.17	1894.97	0.817506	-174.846
			2008	2161	1758.86	2160.99	0.976015	0.00170506	2.90722e-06	0.593448	2912.41	1728.37	0.813913	-30.4968
			2009	1983.41	1351.45	1983.4	0.956582	0.00129858	1.68632e-06	0.581635	2912.51	1694.02	0.681377	342.568
			2010	1804.6	1038.68	1804.6	0.73717	-0.000931035	8.66827e-07	0.448277	2912.53	1305.62	0.575574	266.942
			2011	1914.6	2142.68	1914.6	0.758359	0.000554711	3.07704e-07	0.541454	2912.39	1576.93	1.11913	-565.757
			2012	1944.18	1488.22	1944.18	1.38975	-8.05784e-05	6.49288e-09	0.608058	2678.47	1628.67	0.765472	140.449
			2013	1947.07	1422.62	1947.07	0.946611	0.00145823	2.12642e-06	0.608058	3495.08	2125.21	0.730647	702.595
			2014	1768.22	1461.97	1768.22	0.789014	0.000985075	9.70372e-07	0.608058	2979.16	1811.51	0.826804	349.532
			2015	1793.27	1059.4	1793.27	0.992938	0.00119202	1.42091e-06	0.608058	2564.22	1559.19	0.590765	499.795
											1160.05			978.049
				2473.14	1662.93				2.8004e-05		2995.65	1724.06
			Coeficient of Variability	0.248206	0.330377					Coeficient of Variability	0.110337	0.106326
			Min	1768.22	869.545					Min	2564.22	1305.62
			Max	3346.72	2842.46					Max	3815.76	2125.21
			STDEV	613.849	549.394					STDEV	330.532	183.312
			95% CI	300.786	269.203					95% CI	161.961	89.8227
			Mean (2000-2010)	2839.83	1730.18					Mean (2000-2010)	3038.86	1716.68
			Mean (2011-2015)	1875.74	1514.98					Mean (2011-2015)	2995.53	1740.3
			Mean (2000-2015)	2518.46	1703.17					Mean (2000-2015)	3024.42	1724.06

## Sheet: NorthCentralAnchoveta_PGY
r	1.29583																		PGY	Yield Values
K	19377.8		Y	PredB	PredC	ObsB	ObsC	PredB1	Rec_A	K_A	Dev	Dev2	PredBcorr	PrecC	DIFF				B/BMSY	B/BMSY	Y/MSY	Y
Fmsy	0.647915		2000	9086.39	5887.21	9086.39	9110	9086.39	1	0.681519	0	0	9086.39	4969.97	-4140.03				0.937814	0.5	0	0
SS	0.000445826		2001	9452.49	6124.42	10951.2	5960	10951.2	1.36986	1	0.00308416	9.51206e-06	10369.7	5712.61	-247.388				1.07027	0.505	0.0091	57.1261
B_Rem	806.517		2002	9601.93	6221.24	10627.9	6720	10627.9	0.9134	1	0.00610534	3.72752e-05	13214.1	5712.61	-1007.39				1.36383	0.51	0.0182	114.252
BMSY	9688.91		2003	9657.78	6257.42	9937.58	5130	9937.58	0.969618	1	0.0061686	3.80516e-05	12476.4	5712.61	582.612				1.2877	0.515	0.0273	171.378
BMSY*1.3	12595.6		2004	9677.88	6270.45	10703.9	8070	10703.9	0.939878	1	0.00592808	3.51421e-05	12346.8	5712.61	-2357.39				1.27433	0.52	0.0364	228.504
Fmsy*0.91	0.589603		2005	9685.02	6275.07	10606.2	7570	10606.2	1.28406	1	0.00656659	4.31201e-05	12090.4	5712.61	-1857.39				1.24786	0.525	0.0455	285.631
MSY	6277.6		2006	9687.54	6276.7	9680.65	5000	9680.64	1.06801	1	0.00634178	4.02182e-05	13943.3	5712.61	712.612				1.4391	0.53	0.0546	342.757
MSY*0.91	5712.61		2007	9688.42	6277.28	8737.15	5140	8737.15	0.646188	1	0.00409389	1.67599e-05	13642.6	5712.61	572.612				1.40806	0.535	0.0637	399.883
			2008	9688.74	6277.48	8653.63	5300	8653.62	0.813328	1	0.00592278	3.50793e-05	11311	5712.61	412.612				1.16742	0.54	0.0728	457.009
			2009	9688.85	6277.55	8444.82	5260	8444.81	0.820376	1	0.00599553	3.59464e-05	10561	5712.61	452.612				1.09001	0.545	0.0819	514.135
			2010	9688.89	6277.58	8195.04	3020	8195.03	0.811491	1	0.00603335	3.64013e-05	9956.66	5712.61	2692.61				1.02763	0.55	0.091	571.261
			2011	9688.9	6277.59	8996.2	6310	8996.2	0.623521	1	0.00549858	3.02344e-05	9334.36	5255.6	-1054.4				0.963407	0.555	0.1001	628.387
			2012	9688.9	6277.59	9030.93	3330	9030.92	1.01589	1	0.00629723	3.96552e-05	7987.73	3656.07	326.072				0.824419	0.56	0.1092	685.513
			2013	9688.91	6277.59	9288.69	4500	9288.69	0.574167	1	0.00475967	2.26545e-05	10512.4	5712.61	1212.61				1.08499	0.565	0.1183	742.64
			2014	9688.91	6277.59	7907.08	1920	7907.08	0.497597	1	0.00370818	1.37506e-05	8378.11	4113.08	2193.08				0.864711	0.57	0.1274	799.766
			2015	9688.91	6277.59	8331.51	3340	8331.51	0.386533	1	0.00346767	1.20247e-05	7331.56	2913.43	-426.568				0.756696	0.575	0.1365	856.892
								7370.38	0.386533				6700.99		-1933.1					0.58	0.1456	914.018
						9323.68	5355						10543.7	5234.18						0.585	0.1547	971.144
																				0.59	0.1638	1028.27
																				0.595	0.1729	1085.4
																				0.6	0.182	1142.52
					Coefficient of Variability	0.105396	0.360487					Coefficient of Variability	0.194121	0.168886						0.605	0.1911	1199.65
					Min	7907.08	1920					Min	7331.56	2913.43						0.61	0.2002	1256.77
					Max	10951.2	9110					Max	13943.3	5712.61						0.615	0.2093	1313.9
					STDEV	982.677	1930.41					STDEV	2046.76	883.979						0.62	0.2184	1371.03
					95% CI	481.512	945.899					95% CI	1002.91	433.15						0.625	0.2275	1428.15
																				0.63	0.2366	1485.28
																				0.635	0.2457	1542.41
																				0.64	0.2548	1599.53
					2000-2010	9602.22	6025.45					2000-2010	11727.1	5645.1						0.645	0.2639	1656.66
					2011-2015	8710.88	3880					2011-2015	8708.82	4330.16						0.65	0.273	1713.78
																				0.655	0.2821	1770.91
																				0.66	0.2912	1828.04
																				0.665	0.3003	1885.16
																				0.67	0.3094	1942.29
																				0.675	0.3185	1999.41
																				0.68	0.3276	2056.54
																				0.685	0.3367	2113.67
																				0.69	0.3458	2170.79
																				0.695	0.3549	2227.92
																				0.7	0.364	2285.04
																				0.705	0.3731	2342.17
																				0.71	0.3822	2399.3
																				0.715	0.3913	2456.42
																				0.72	0.4004	2513.55
																				0.725	0.4095	2570.68
																				0.73	0.4186	2627.8
																				0.735	0.4277	2684.93
																				0.74	0.4368	2742.05
																				0.745	0.4459	2799.18
																				0.75	0.455	2856.31
																				0.755	0.4641	2913.43
																				0.76	0.4732	2970.56
																				0.765	0.4823	3027.68
																				0.77	0.4914	3084.81
																				0.775	0.5005	3141.94
																				0.78	0.5096	3199.06
																				0.785	0.5187	3256.19
																				0.79	0.5278	3313.32
																				0.795	0.5369	3370.44
																				0.8	0.546	3427.57
																				0.805	0.5551	3484.69
																				0.81	0.5642	3541.82
																				0.815	0.5733	3598.95
																				0.82	0.5824	3656.07
																				0.825	0.5915	3713.2
																				0.83	0.6006	3770.32
																				0.835	0.6097	3827.45
																				0.84	0.6188	3884.58
																				0.845	0.6279	3941.7
																				0.85	0.637	3998.83
																				0.855	0.6461	4055.95
																				0.86	0.6552	4113.08
																				0.865	0.6643	4170.21
																				0.87	0.6734	4227.33
																				0.875	0.6825	4284.46
																				0.88	0.6916	4341.59
																				0.885	0.7007	4398.71
																				0.89	0.7098	4455.84
																				0.895	0.7189	4512.96
																				0.9	0.728	4570.09
																				0.905	0.7371	4627.22
																				0.91	0.7462	4684.34
																				0.915	0.7553	4741.47
																				0.92	0.7644	4798.59
																				0.925	0.7735	4855.72
																				0.93	0.7826	4912.85
																				0.935	0.7917	4969.97
																				0.94	0.8008	5027.1
																				0.945	0.8099	5084.23
																				0.95	0.819	5141.35
																				0.955	0.8281	5198.48
																				0.96	0.8372	5255.6
																				0.965	0.8463	5312.73
																				0.97	0.8554	5369.86
																				0.975	0.8645	5426.98
																				0.98	0.8736	5484.11
																				0.985	0.8827	5541.23
																				0.99	0.8918	5598.36
																				0.995	0.9009	5655.49
																				1	0.91	5712.61

## Sheet: SouthernAnchoveta_PGY
r	1.21612																	PGY	Yield Values
K	5824.88		Y	PredB	PredC	ObsB	ObsC	PredB1	Rec_A	Dev	Dev2	PredBcorr	PrecC	DIFF				B/BMSY	B/BMSY	Y/MSY	Y
Fmsy	0.608058		2000	2777.36	1688.8	2777.36	1594.36	2777.36	1	0	0	2777.36	1450.4	-143.962				0.953621	0.5	0	0
SS	2.8004e-05		2001	2855.69	1736.43	3108.44	1134.18	3108.44	1.08959	0.00182318	3.32399e-06	3094.09	1611.55	477.371				1.06237	0.505	0.0091	16.1155
B_Rem	0		2002	2889.53	1757	3346.72	2842.46	3346.72	0.778513	0.00121139	1.46748e-06	3404.62	1611.55	-1230.91				1.16899	0.51	0.0182	32.231
BMSY	2912.44		2003	2903.35	1765.41	3191.72	869.545	3191.72	1.55204	0.00117099	1.37123e-06	3132.4	1611.55	742.006				1.07552	0.515	0.0273	48.3465
BMSY*1.3	3786.17		2004	2908.86	1768.76	3327.45	2192.76	3327.45	0.572923	0.000170225	2.89765e-08	4253.74	1611.55	-581.211				1.46054	0.52	0.0364	64.462
Fmsy*0.91	0.553333		2005	2911.04	1770.08	3044.33	2400.22	3044.33	1.10067	0.00172816	2.98655e-06	3441.6	1611.55	-788.672				1.18169	0.525	0.0455	80.5775
MSY	1770.93		2006	2911.89	1770.6	2925.99	1779.67	2925.99	1.29116	0.00191994	3.68618e-06	3714.92	1611.55	-168.116				1.27554	0.53	0.0546	96.693
MSY*0.91	1611.55		2007	2912.23	1770.8	2531.86	2069.82	2531.86	0.782396	0.00220166	4.84732e-06	4216.34	1611.55	-458.264				1.4477	0.535	0.0637	112.809
			2008	2912.36	1770.88	2161	1758.86	2160.99	0.976015	0.00170506	2.90722e-06	3712.65	1611.55	-147.311				1.27475	0.54	0.0728	128.924
			2009	2912.41	1770.91	1983.41	1351.45	1983.4	0.956582	0.00129858	1.68632e-06	3699.07	1611.55	260.104				1.27009	0.545	0.0819	145.04
			2010	2912.43	1770.93	1804.6	1038.68	1804.6	0.73717	-0.000931035	8.66827e-07	3657.99	1611.55	572.87				1.25599	0.55	0.091	161.155
			2011	2912.44	1770.93	1914.6	2142.68	1914.6	0.758359	0.000554711	3.07704e-07	3266.37	1611.55	-531.133				1.12152	0.555	0.1001	177.271
			2012	2912.44	1770.93	1944.18	1488.22	1944.18	1.38975	-8.05784e-05	6.49288e-09	2977.99	1611.55	123.334				1.02251	0.56	0.1092	193.386
			2013	2912.44	1770.93	1947.07	1422.62	1947.07	0.946611	0.00145823	2.12642e-06	3826.35	1611.55	188.933				1.3138	0.565	0.1183	209.502
			2014	2912.44	1770.93	1768.22	1461.97	1768.22	0.789014	0.000985075	9.70372e-07	3726.12	1611.55	149.578				1.27938	0.57	0.1274	225.617
			2015	2912.44	1770.93	1793.27	1059.4	1793.27	0.992938	0.00119202	1.42091e-06	3402.8	1611.55	552.152				1.16837	0.575	0.1365	241.733
												3499.83		-983.233					0.58	0.1456	257.848
						2473.14	1662.93				2.8004e-05	3517.9	1601.48						0.585	0.1547	273.964
																			0.59	0.1638	290.079
																			0.595	0.1729	306.195
																			0.6	0.182	322.31
					Coeficient of Variability	0.248206	0.330377				Coeficient of Variability	0.117439	0.0251572						0.605	0.1911	338.426
					Min	1768.22	869.545				Min	2777.36	1450.4						0.61	0.2002	354.541
					Max	3346.72	2842.46				Max	4253.74	1611.55						0.615	0.2093	370.657
					STDEV	613.849	549.394				STDEV	413.137	40.2888						0.62	0.2184	386.772
					95% CI	300.786	269.203				95% CI	202.437	19.7415						0.625	0.2275	402.888
																			0.63	0.2366	419.003
																			0.635	0.2457	435.119
																			0.64	0.2548	451.234
					2000-2010	2745.72	1730.18				2000-2010	3554.98	1596.9						0.645	0.2639	467.35
					2011-2015	1873.47	1514.98				2011-2015	3439.93	1611.55						0.65	0.273	483.465
																			0.655	0.2821	499.581
																			0.66	0.2912	515.696
																			0.665	0.3003	531.812
																			0.67	0.3094	547.927
																			0.675	0.3185	564.043
																			0.68	0.3276	580.158
																			0.685	0.3367	596.274
																			0.69	0.3458	612.389
																			0.695	0.3549	628.505
																			0.7	0.364	644.62
																			0.705	0.3731	660.736
																			0.71	0.3822	676.851
																			0.715	0.3913	692.967
																			0.72	0.4004	709.082
																			0.725	0.4095	725.198
																			0.73	0.4186	741.313
																			0.735	0.4277	757.429
																			0.74	0.4368	773.544
																			0.745	0.4459	789.66
																			0.75	0.455	805.775
																			0.755	0.4641	821.891
																			0.76	0.4732	838.006
																			0.765	0.4823	854.122
																			0.77	0.4914	870.237
																			0.775	0.5005	886.353
																			0.78	0.5096	902.468
																			0.785	0.5187	918.584
																			0.79	0.5278	934.699
																			0.795	0.5369	950.815
																			0.8	0.546	966.93
																			0.805	0.5551	983.046
																			0.81	0.5642	999.161
																			0.815	0.5733	1015.28
																			0.82	0.5824	1031.39
																			0.825	0.5915	1047.51
																			0.83	0.6006	1063.62
																			0.835	0.6097	1079.74
																			0.84	0.6188	1095.85
																			0.845	0.6279	1111.97
																			0.85	0.637	1128.09
																			0.855	0.6461	1144.2
																			0.86	0.6552	1160.32
																			0.865	0.6643	1176.43
																			0.87	0.6734	1192.55
																			0.875	0.6825	1208.66
																			0.88	0.6916	1224.78
																			0.885	0.7007	1240.89
																			0.89	0.7098	1257.01
																			0.895	0.7189	1273.12
																			0.9	0.728	1289.24
																			0.905	0.7371	1305.36
																			0.91	0.7462	1321.47
																			0.915	0.7553	1337.59
																			0.92	0.7644	1353.7
																			0.925	0.7735	1369.82
																			0.93	0.7826	1385.93
																			0.935	0.7917	1402.05
																			0.94	0.8008	1418.16
																			0.945	0.8099	1434.28
																			0.95	0.819	1450.4
																			0.955	0.8281	1466.51
																			0.96	0.8372	1482.63
																			0.965	0.8463	1498.74
																			0.97	0.8554	1514.86
																			0.975	0.8645	1530.97
																			0.98	0.8736	1547.09
																			0.985	0.8827	1563.2
																			0.99	0.8918	1579.32
																			0.995	0.9009	1595.44
																			1	0.91	1611.55

## Sheet: SouthernAnchovetaCatchSplit
Portions			Absolute
Peru's Catch	Chile's Catch		Peru's Catch	Chile's Catch
0.380177	0.619823		636311	1.03741e+06
0.450606	0.549394		786575	959019
0.648872	0.351128		1.0927e+06	591299
0.299937	0.700063		500773	1.16882e+06
0.451935	0.548065		878882	1.06583e+06
0.595135	0.404865		1.00893e+06	686367
0.652203	0.347797		1.20497e+06	642567
0.60837	0.39163		1.15284e+06	742128
0.644887	0.355113		1.1146e+06	613765
0.547664	0.452336		927751	766265
0.388132	0.611868		506754	798869
0.411378	0.588622		648714	928214
0.324849	0.675151		529071	1.09959e+06
0.233162	0.766838		495519	1.62969e+06
0.308726	0.691274		559259	1.25225e+06
0.373518	0.626482		582387	976807
			789127	934931
		Coeficient of Variability	0.332753	0.295881
		Min	495519	591299
		Max	1.20497e+06	1.62969e+06
		STDEV	262585	276628
		95% CI	128667	135548
		Mean (2000-2010)	930434	827347
		Mean (2011-2015)	547863	1.14172e+06
		Mean (2000-2015)	802910	932139

## Sheet: Figure2Data
Scenario	Stock	Indicator	Year	Value
Baseline	North-Central	F/Fmsy	2000	1.54742
Baseline	North-Central	F/Fmsy	2001	0.839971
Baseline	North-Central	F/Fmsy	2002	0.975898
Baseline	North-Central	F/Fmsy	2003	0.796743
Baseline	North-Central	F/Fmsy	2004	1.16363
Baseline	North-Central	F/Fmsy	2005	1.10158
Baseline	North-Central	F/Fmsy	2006	0.797163
Baseline	North-Central	F/Fmsy	2007	0.907977
Baseline	North-Central	F/Fmsy	2008	0.945278
Baseline	North-Central	F/Fmsy	2009	0.96134
Baseline	North-Central	F/Fmsy	2010	0.568771
Baseline	North-Central	F/Fmsy	2011	1.08256
Baseline	North-Central	F/Fmsy	2012	0.569106
Baseline	North-Central	F/Fmsy	2013	0.747721
Baseline	North-Central	F/Fmsy	2014	0.374772
Baseline	North-Central	F/Fmsy	2015	0.618734
Baseline	South	F/Fmsy	2000	0.944078
Baseline	South	F/Fmsy	2001	0.600059
Baseline	South	F/Fmsy	2002	1.39678
Baseline	South	F/Fmsy	2003	0.448046
Baseline	South	F/Fmsy	2004	1.08376
Baseline	South	F/Fmsy	2005	1.29662
Baseline	South	F/Fmsy	2006	1.00028
Baseline	South	F/Fmsy	2007	1.34445
Baseline	South	F/Fmsy	2008	1.33854
Baseline	South	F/Fmsy	2009	1.12058
Baseline	South	F/Fmsy	2010	0.946577
Baseline	South	F/Fmsy	2011	1.84049
Baseline	South	F/Fmsy	2012	1.25888
Baseline	South	F/Fmsy	2013	1.20161
Baseline	South	F/Fmsy	2014	1.35974
Baseline	South	F/Fmsy	2015	0.971559
Baseline	North-Central	B/Bmsy	2000	0.937814
Baseline	North-Central	B/Bmsy	2001	1.13029
Baseline	North-Central	B/Bmsy	2002	1.09691
Baseline	North-Central	B/Bmsy	2003	1.02567
Baseline	North-Central	B/Bmsy	2004	1.10475
Baseline	North-Central	B/Bmsy	2005	1.09467
Baseline	North-Central	B/Bmsy	2006	0.999147
Baseline	North-Central	B/Bmsy	2007	0.901768
Baseline	North-Central	B/Bmsy	2008	0.893147
Baseline	North-Central	B/Bmsy	2009	0.871596
Baseline	North-Central	B/Bmsy	2010	0.845816
Baseline	North-Central	B/Bmsy	2011	0.928505
Baseline	North-Central	B/Bmsy	2012	0.932089
Baseline	North-Central	B/Bmsy	2013	0.958693
Baseline	North-Central	B/Bmsy	2014	0.816096
Baseline	North-Central	B/Bmsy	2015	0.859902
Baseline	South	B/Bmsy	2000	0.953621
Baseline	South	B/Bmsy	2001	1.0673
Baseline	South	B/Bmsy	2002	1.14911
Baseline	South	B/Bmsy	2003	1.09589
Baseline	South	B/Bmsy	2004	1.1425
Baseline	South	B/Bmsy	2005	1.04529
Baseline	South	B/Bmsy	2006	1.00465
Baseline	South	B/Bmsy	2007	0.869327
Baseline	South	B/Bmsy	2008	0.741988
Baseline	South	B/Bmsy	2009	0.681011
Baseline	South	B/Bmsy	2010	0.619618
Baseline	South	B/Bmsy	2011	0.657388
Baseline	South	B/Bmsy	2012	0.667544
Baseline	South	B/Bmsy	2013	0.668534
Baseline	South	B/Bmsy	2014	0.607127
Baseline	South	B/Bmsy	2015	0.615726
Baseline	North-Central	Revenue (Million USD)	2000	1216.19
Baseline	North-Central	Revenue (Million USD)	2001	795.662
Baseline	North-Central	Revenue (Million USD)	2002	897.122
Baseline	North-Central	Revenue (Million USD)	2003	684.857
Baseline	North-Central	Revenue (Million USD)	2004	1077.35
Baseline	North-Central	Revenue (Million USD)	2005	1010.6
Baseline	North-Central	Revenue (Million USD)	2006	667.502
Baseline	North-Central	Revenue (Million USD)	2007	686.192
Baseline	North-Central	Revenue (Million USD)	2008	707.552
Baseline	North-Central	Revenue (Million USD)	2009	702.212
Baseline	North-Central	Revenue (Million USD)	2010	403.171
Baseline	North-Central	Revenue (Million USD)	2011	842.387
Baseline	North-Central	Revenue (Million USD)	2012	444.556
Baseline	North-Central	Revenue (Million USD)	2013	600.752
Baseline	North-Central	Revenue (Million USD)	2014	256.321
Baseline	North-Central	Revenue (Million USD)	2015	445.891
Baseline	South	Revenue (Million USD)	2000	80.9197
Baseline	South	Revenue (Million USD)	2001	68.2278
Baseline	South	Revenue (Million USD)	2002	246.227
Baseline	South	Revenue (Million USD)	2003	34.818
Baseline	South	Revenue (Million USD)	2004	132.297
Baseline	South	Revenue (Million USD)	2005	190.7
Baseline	South	Revenue (Million USD)	2006	154.954
Baseline	South	Revenue (Million USD)	2007	168.105
Baseline	South	Revenue (Million USD)	2008	151.425
Baseline	South	Revenue (Million USD)	2009	98.8088
Baseline	South	Revenue (Million USD)	2010	53.8201
Baseline	South	Revenue (Million USD)	2011	117.674
Baseline	South	Revenue (Million USD)	2012	64.5403
Baseline	South	Revenue (Million USD)	2013	44.2821
Baseline	South	Revenue (Million USD)	2014	60.2553
Baseline	South	Revenue (Million USD)	2015	52.8267
Optimal-F	North-Central	F/Fmsy	2000	1
Optimal-F	North-Central	F/Fmsy	2001	1
Optimal-F	North-Central	F/Fmsy	2002	1
Optimal-F	North-Central	F/Fmsy	2003	1
Optimal-F	North-Central	F/Fmsy	2004	1
Optimal-F	North-Central	F/Fmsy	2005	1
Optimal-F	North-Central	F/Fmsy	2006	1
Optimal-F	North-Central	F/Fmsy	2007	0.805418
Optimal-F	North-Central	F/Fmsy	2008	0.887172
Optimal-F	North-Central	F/Fmsy	2009	0.894866
Optimal-F	North-Central	F/Fmsy	2010	0.885169
Optimal-F	North-Central	F/Fmsy	2011	0.701086
Optimal-F	North-Central	F/Fmsy	2012	1
Optimal-F	North-Central	F/Fmsy	2013	0.680308
Optimal-F	North-Central	F/Fmsy	2014	0.542776
Optimal-F	North-Central	F/Fmsy	2015	0.657495
Optimal-F	South	F/Fmsy	2000	0.991072
Optimal-F	South	F/Fmsy	2001	1
Optimal-F	South	F/Fmsy	2002	0.906726
Optimal-F	South	F/Fmsy	2003	1
Optimal-F	South	F/Fmsy	2004	0.838163
Optimal-F	South	F/Fmsy	2005	1
Optimal-F	South	F/Fmsy	2006	1
Optimal-F	South	F/Fmsy	2007	0.897286
Optimal-F	South	F/Fmsy	2008	0.975972
Optimal-F	South	F/Fmsy	2009	0.956544
Optimal-F	South	F/Fmsy	2010	0.737227
Optimal-F	South	F/Fmsy	2011	0.890464
Optimal-F	South	F/Fmsy	2012	1
Optimal-F	South	F/Fmsy	2013	1
Optimal-F	South	F/Fmsy	2014	1
Optimal-F	South	F/Fmsy	2015	1
Optimal-F	North-Central	B/Bmsy	2000	0.937814
Optimal-F	North-Central	B/Bmsy	2001	1.02953
Optimal-F	North-Central	B/Bmsy	2002	1.55254
Optimal-F	North-Central	B/Bmsy	2003	1.01169
Optimal-F	North-Central	B/Bmsy	2004	1.03828
Optimal-F	North-Central	B/Bmsy	2005	1.02756
Optimal-F	North-Central	B/Bmsy	2006	1.24705
Optimal-F	North-Central	B/Bmsy	2007	1.14275
Optimal-F	North-Central	B/Bmsy	2008	0.999973
Optimal-F	North-Central	B/Bmsy	2009	0.999969
Optimal-F	North-Central	B/Bmsy	2010	1.00007
Optimal-F	North-Central	B/Bmsy	2011	1.00014
Optimal-F	North-Central	B/Bmsy	2012	0.987472
Optimal-F	North-Central	B/Bmsy	2013	1.05971
Optimal-F	North-Central	B/Bmsy	2014	0.999974
Optimal-F	North-Central	B/Bmsy	2015	1.00015
Optimal-F	South	B/Bmsy	2000	0.953621
Optimal-F	South	B/Bmsy	2001	0.985691
Optimal-F	South	B/Bmsy	2002	1.04873
Optimal-F	South	B/Bmsy	2003	0.942778
Optimal-F	South	B/Bmsy	2004	1.31016
Optimal-F	South	B/Bmsy	2005	0.957291
Optimal-F	South	B/Bmsy	2006	1.04325
Optimal-F	South	B/Bmsy	2007	1.19253
Optimal-F	South	B/Bmsy	2008	0.99999
Optimal-F	South	B/Bmsy	2009	1.00002
Optimal-F	South	B/Bmsy	2010	1.00003
Optimal-F	South	B/Bmsy	2011	0.999983
Optimal-F	South	B/Bmsy	2012	0.919664
Optimal-F	South	B/Bmsy	2013	1.20005
Optimal-F	South	B/Bmsy	2014	1.02291
Optimal-F	South	B/Bmsy	2015	0.880436
Optimal-F	North-Central	Revenue (Million USD)	2000	738.136
Optimal-F	North-Central	Revenue (Million USD)	2001	793.244
Optimal-F	North-Central	Revenue (Million USD)	2002	1197.16
Optimal-F	North-Central	Revenue (Million USD)	2003	770.196
Optimal-F	North-Central	Revenue (Million USD)	2004	815.719
Optimal-F	North-Central	Revenue (Million USD)	2005	804.197
Optimal-F	North-Central	Revenue (Million USD)	2006	941.808
Optimal-F	North-Central	Revenue (Million USD)	2007	712.93
Optimal-F	North-Central	Revenue (Million USD)	2008	683.485
Optimal-F	North-Central	Revenue (Million USD)	2009	688.481
Optimal-F	North-Central	Revenue (Million USD)	2010	645.176
Optimal-F	North-Central	Revenue (Million USD)	2011	553.41
Optimal-F	North-Central	Revenue (Million USD)	2012	717.992
Optimal-F	North-Central	Revenue (Million USD)	2013	559.781
Optimal-F	North-Central	Revenue (Million USD)	2014	397.34
Optimal-F	North-Central	Revenue (Million USD)	2015	500.318
Optimal-F	South	Revenue (Million USD)	2000	84.6325
Optimal-F	South	Revenue (Million USD)	2001	100.788
Optimal-F	South	Revenue (Million USD)	2002	150.309
Optimal-F	South	Revenue (Million USD)	2003	62.2676
Optimal-F	South	Revenue (Million USD)	2004	118.321
Optimal-F	South	Revenue (Million USD)	2005	137.642
Optimal-F	South	Revenue (Million USD)	2006	160.406
Optimal-F	South	Revenue (Million USD)	2007	154.874
Optimal-F	South	Revenue (Million USD)	2008	148.992
Optimal-F	South	Revenue (Million USD)	2009	121.514
Optimal-F	South	Revenue (Million USD)	2010	66.3557
Optimal-F	South	Revenue (Million USD)	2011	88.3084
Optimal-F	South	Revenue (Million USD)	2012	70.1342
Optimal-F	South	Revenue (Million USD)	2013	63.7162
Optimal-F	South	Revenue (Million USD)	2014	73.3305
Optimal-F	South	Revenue (Million USD)	2015	75.0142
PGY	North-Central	F/Fmsy	2000	0.844198
PGY	North-Central	F/Fmsy	2001	0.850254
PGY	North-Central	F/Fmsy	2002	0.667237
PGY	North-Central	F/Fmsy	2003	0.706689
PGY	North-Central	F/Fmsy	2004	0.714103
PGY	North-Central	F/Fmsy	2005	0.729251
PGY	North-Central	F/Fmsy	2006	0.632338
PGY	North-Central	F/Fmsy	2007	0.64628
PGY	North-Central	F/Fmsy	2008	0.7795
PGY	North-Central	F/Fmsy	2009	0.834855
PGY	North-Central	F/Fmsy	2010	0.885529
PGY	North-Central	F/Fmsy	2011	0.869
PGY	North-Central	F/Fmsy	2012	0.706437
PGY	North-Central	F/Fmsy	2013	0.838718
PGY	North-Central	F/Fmsy	2014	0.75771
PGY	North-Central	F/Fmsy	2015	0.613324
PGY	South	F/Fmsy	2000	0.858832
PGY	South	F/Fmsy	2001	0.856574
PGY	South	F/Fmsy	2002	0.778448
PGY	South	F/Fmsy	2003	0.846101
PGY	South	F/Fmsy	2004	0.623057
PGY	South	F/Fmsy	2005	0.770084
PGY	South	F/Fmsy	2006	0.713426
PGY	South	F/Fmsy	2007	0.628583
PGY	South	F/Fmsy	2008	0.713863
PGY	South	F/Fmsy	2009	0.716483
PGY	South	F/Fmsy	2010	0.724531
PGY	South	F/Fmsy	2011	0.811397
PGY	South	F/Fmsy	2012	0.88997
PGY	South	F/Fmsy	2013	0.69265
PGY	South	F/Fmsy	2014	0.711282
PGY	South	F/Fmsy	2015	0.778866
PGY	North-Central	B/Bmsy	2000	0.937814
PGY	North-Central	B/Bmsy	2001	1.07027
PGY	North-Central	B/Bmsy	2002	1.36383
PGY	North-Central	B/Bmsy	2003	1.2877
PGY	North-Central	B/Bmsy	2004	1.27433
PGY	North-Central	B/Bmsy	2005	1.24786
PGY	North-Central	B/Bmsy	2006	1.4391
PGY	North-Central	B/Bmsy	2007	1.40806
PGY	North-Central	B/Bmsy	2008	1.16742
PGY	North-Central	B/Bmsy	2009	1.09001
PGY	North-Central	B/Bmsy	2010	1.02763
PGY	North-Central	B/Bmsy	2011	0.963407
PGY	North-Central	B/Bmsy	2012	0.824419
PGY	North-Central	B/Bmsy	2013	1.08499
PGY	North-Central	B/Bmsy	2014	0.864711
PGY	North-Central	B/Bmsy	2015	0.756696
PGY	South	B/Bmsy	2000	0.953621
PGY	South	B/Bmsy	2001	1.06237
PGY	South	B/Bmsy	2002	1.16899
PGY	South	B/Bmsy	2003	1.07552
PGY	South	B/Bmsy	2004	1.46054
PGY	South	B/Bmsy	2005	1.18169
PGY	South	B/Bmsy	2006	1.27554
PGY	South	B/Bmsy	2007	1.4477
PGY	South	B/Bmsy	2008	1.27475
PGY	South	B/Bmsy	2009	1.27009
PGY	South	B/Bmsy	2010	1.25599
PGY	South	B/Bmsy	2011	1.12152
PGY	South	B/Bmsy	2012	1.02251
PGY	South	B/Bmsy	2013	1.3138
PGY	South	B/Bmsy	2014	1.27938
PGY	South	B/Bmsy	2015	1.16837
PGY	North-Central	Revenue (Million USD)	2000	685.973
PGY	North-Central	Revenue (Million USD)	2001	764.996
PGY	North-Central	Revenue (Million USD)	2002	771.159
PGY	North-Central	Revenue (Million USD)	2003	756.179
PGY	North-Central	Revenue (Million USD)	2004	779.245
PGY	North-Central	Revenue (Million USD)	2005	776.587
PGY	North-Central	Revenue (Million USD)	2006	754.532
PGY	North-Central	Revenue (Million USD)	2007	756.302
PGY	North-Central	Revenue (Million USD)	2008	758.209
PGY	North-Central	Revenue (Million USD)	2009	757.743
PGY	North-Central	Revenue (Million USD)	2010	711.942
PGY	North-Central	Revenue (Million USD)	2011	710.366
PGY	North-Central	Revenue (Million USD)	2012	484.524
PGY	North-Central	Revenue (Million USD)	2013	747.314
PGY	North-Central	Revenue (Million USD)	2014	502.338
PGY	North-Central	Revenue (Million USD)	2015	392.648
PGY	South	Revenue (Million USD)	2000	74.1086
PGY	South	Revenue (Million USD)	2001	93.9025
PGY	South	Revenue (Million USD)	2002	144.107
PGY	South	Revenue (Million USD)	2003	60.4239
PGY	South	Revenue (Million USD)	2004	99.1519
PGY	South	Revenue (Million USD)	2005	131.176
PGY	South	Revenue (Million USD)	2006	141.305
PGY	South	Revenue (Million USD)	2007	133.047
PGY	South	Revenue (Million USD)	2008	139.609
PGY	South	Revenue (Million USD)	2009	116.135
PGY	South	Revenue (Million USD)	2010	80.0702
PGY	South	Revenue (Million USD)	2011	90.1406
PGY	South	Revenue (Million USD)	2012	69.4571
PGY	South	Revenue (Million USD)	2013	49.6664
PGY	South	Revenue (Million USD)	2014	65.9135
PGY	South	Revenue (Million USD)	2015	77.2371

## Sheet: CMSY_Output
Group	Region	Subregion	Name	SciName	Stock	start.yr	end.yr	btype	MaxCatch	LastCatch	MSY_BSM	lcl	ucl	r_BSM	lcl	ucl	k_BSM	lcl	ucl	q_BSM	lcl	ucl	rel_B_BSM	lcl	ucl	rel_F_BSM	r_CMSY	lcl	ucl	k_CMSY	lcl	ucl	MSY_CMSY	lcl	ucl	rel_B_CMSY	2.5th	97.5th	rel_F_CMSY	F_msy	lcl	ucl	curF_msy	lcl	ucl	MSY	lcl	ucl	Bmsy
Plankton feeders	FAO 87	Peru EEZ	Anchoveta North-Center	Engraulis ringens	PE_AN_NC	1985	2016	biomass	9110	2480	6277.6	5380.06	7324.87	1.29583	1.07768	1.55814	19377.8	16561.1	22673.6	NA	NA	NA	0.414497	0.281588	0.510794	0.476549	3.00041	2.87018	3.13655	15171.5	11375	20235.1	11380.2	7159.62	18088.8	0.304357	0.176533	0.397151	0.358005	0.647915	0.538839	0.779072	0.647915	0.538839	0.779072	6277.6	5380.06	7324.87	9688.91
Plankton feeders	FAO 87	Peru/Chile	Anchoveta South Peru/North Chile	Engraulis ringens	PERUCHILE	1985	2015	CPUE	2842.46	1059.4	1770.93	1704.06	1840.43	1.21612	1.09826	1.34662	5824.88	5276.21	6430.62	0.690294	0.587259	0.811406	0.307863	0.245826	0.421202	0.971559	2.56639	2.09725	3.14048	4357.84	2677.5	7092.7	2795.98	1598.65	4890.05	0.369385	0.0396088	0.497405	0.512881	0.608058	0.549129	0.673312	0.608058	0.549129	0.673312	1770.93	1704.06	1840.43	2912.44
Small pelagic	Western Atlantic	USA EEZ	Atlantic menhaden	Brevoortia tyrannus	ATL_MENH	1970	2015	CPUE	430	201	358.139	328.634	390.294	1.21754	0.992093	1.49422	1176.6	977.746	1415.9	0.000674259	0.000600249	0.000757394	0.659957	0.529372	0.784016	0.425206	0.67032	0.506617	0.88692	1931.49	1580.76	2360.04	323.68	288.963	362.568	0.50394	0.303304	0.591973	0.616129	0.608769	0.496046	0.747108	0.608769	0.496046	0.747108	358.139	328.634	390.294	588.3
Small pelagic	Western Atlantic	USA EEZ	Gulf menhaden	Brevoortia patronus	GULF_MENH	1970	2015	CPUE	985	539	645.54	581.627	716.477	0.978642	0.74521	1.28519	2638.52	2020.28	3445.94	0.0010118	0.000831122	0.00123175	0.603842	0.411257	0.740088	0.691372	0.569783	0.476816	0.680876	4662.86	3772.53	5763.3	664.204	621.68	709.636	0.520815	0.282335	0.597468	0.779065	0.489321	0.372605	0.642597	0.489321	0.372605	0.642597	645.54	581.627	716.477	1319.26
[truncated: 66 more columns]

## Sheet: PriceElasticity
Year	Month	Ex-Vessel	FM_Price	Landings
1990	Jan	4.10582	6.06379	7.6001
1990	Feb	5.48601	6.05444	4.98566
1990	Mar	5.34126	5.95324	5.93991
1990	Apr	4.4257	5.9428	10.0336
1990	May	5.08152	5.92426	11.281
1990	Jun	4.45854	5.8693	11.935
1990	Jul	4.48895	5.94803	12.1006
1990	Aug	4.47045	6.00881	12.0108
1990	Sep	4.53955	6.03309	11.9663
1990	Oct	4.61416	6.07535	11.299
1990	Nov	4.65706	6.1591	10.1237
1990	Dec	4.58053	6.17587	10.5183
1991	Jan	4.15713	6.17379	8.67647
1991	Feb	5.33869	6.16542	6.2178
1991	Mar	5.14449	6.1203	5.7792
1991	Apr	4.63767	6.12905	10.0759
1991	May	4.62563	6.15486	11.2707
1991	Jun	4.71526	6.17794	11.8929
1991	Jul	4.63911	6.15486	12.1796
1991	Aug	4.65796	6.11368	12.0458
1991	Sep	4.74424	6.16961	11.7315
1991	Oct	4.72429	6.2106	11.2626
1991	Nov	4.57323	6.23832	10.5137
1991	Dec	4.48397	6.21461	10.5192
1992	Jan	4.2312	6.21461	8.4591
1992	Feb	4.69717	6.20254	5.93225
1992	Mar	4.37456	6.19032	8.04732
1992	Apr	4.28421	6.19236	10.1442
1992	May	4.78834	6.20456	11.4028
1992	Jun	4.69956	6.19644	11.8573
1992	Jul	4.6518	6.18415	11.8035
1992	Aug	4.89124	6.20051	11.762
1992	Sep	4.7566	6.17587	11.535
1992	Oct	4.74098	6.1506	11.2185
1992	Nov	4.68037	6.1203	9.88602
1992	Dec	4.50835	6.08222	9.97702
1993	Jan	4.70497	6.03548	6.11014
1993	Feb	5.33019	5.96871	5.15271
1993	Mar	5.22347	5.93225	5.7314
1993	Apr	4.74806	5.88888	9.89545
1993	May	4.74238	5.8522	11.628
1993	Jun	4.75441	5.8522	11.7368
1993	Jul	4.72524	5.87493	12.0712
1993	Aug	4.76529	5.88888	11.9863
1993	Sep	4.71426	5.86647	11.7582
1993	Oct	4.73162	5.826	11.5923
1993	Nov	4.8462	5.88053	10.8213
1993	Dec	4.5273	5.90536	9.69635
1994	Jan	5.2425	5.90263	4.29592
1994	Feb	5.29689	5.89715	4.77744
1994	Mar	5.39184	5.86363	4.97673
1994	Apr	4.87327	5.86079	10.5436
1994	May	4.69159	5.89164	11.9294
1994	Jun	4.71176	5.8999	12.0369
1994	Jul	4.71621	5.92959	12.1005
1994	Aug	4.72467	5.93489	12.2703
1994	Sep	4.73238	5.97126	12.1132
1994	Oct	4.76385	5.98645	11.3257
1994	Nov	4.83518	5.97635	10.4862
1994	Dec	4.79711	6.03548	8.94851
1995	Jan	5.11974	6.07535	6.39409
1995	Feb	5.33558	6.07993	5.1996
1995	Mar	5.23017	6.10256	5.57291
1995	Apr	4.83448	6.10256	10.1036
1995	May	4.77748	6.07764	11.2449
1995	Jun	4.74712	6.14633	11.8705
1995	Jul	4.78406	6.2186	11.9464
1995	Aug	4.77745	6.20051	11.9373
1995	Sep	4.77345	6.22456	11.8575
1995	Oct	4.81697	6.25767	11.1713
1995	Nov	4.90091	6.40026	10.5763
1995	Dec	4.88618	6.47235	10.3599
1996	Jan	5.30022	6.47543	6.91919
1996	Feb	5.68178	6.46303	4.49536
1996	Mar	5.69504	6.42325	4.64247
1996	Apr	4.7472	6.36819	10.2555
1996	May	4.75381	6.33505	11.6044
1996	Jun	4.76531	6.33328	11.8452
1996	Jul	4.80574	6.30445	11.4482
1996	Aug	4.80021	6.28972	11.8501
1996	Sep	4.75071	6.33859	11.9204
1996	Oct	4.81387	6.36475	11.2743
1996	Nov	4.99495	6.39693	10.7074
1996	Dec	5.28925	6.36819	9.32148
1997	Jan	5.29364	6.35611	9.00346
1997	Feb	5.51841	6.32436	4.27944
1997	Mar	5.37585	6.31716	6.30883
1997	Apr	4.86287	6.30445	9.62018
1997	May	4.80383	6.30628	11.4446
1997	Jun	4.80351	6.32436	12.0109
1997	Jul	4.81459	6.36475	11.8957
1997	Aug	4.81004	6.43133	12.0051
1997	Sep	4.78013	6.45677	11.9289
1997	Oct	4.82317	6.4892	11.5286
1997	Nov	5.02259	6.57368	10.4753
1997	Dec	5.09305	6.58064	10.3407
1998	Jan	5.23042	6.55536	5.26476
1998	Feb	5.07805	6.54965	6.70049
1998	Mar	5.40063	6.52503	5.24122
1998	Apr	4.8074	6.52796	10.2013
1998	May	4.82293	6.52942	11.6628
1998	Jun	4.87342	6.51471	11.5842
1998	Jul	4.85228	6.49224	11.9183
1998	Aug	4.90326	6.50728	11.8202
1998	Sep	5.00766	6.52356	11.3355
1998	Oct	4.96913	6.49527	11.4205
1998	Nov	5.15518	6.39859	10.5238
1998	Dec	5.1372	6.29342	9.92252
1999	Jan	4.91341	6.21461	8.57454
1999	Feb	5.60998	6.1181	4.79414
1999	Mar	5.45135	6.00635	5.5865
1999	Apr	4.77601	5.8522	10.6924
1999	May	4.75812	5.82008	11.561
1999	Jun	4.80912	5.84354	12.0202
1999	Jul	4.84692	5.87212	12.0518
1999	Aug	4.83785	5.9162	11.9111
1999	Sep	4.81852	5.94542	11.9374
1999	Oct	4.95144	5.98896	11.1975
1999	Nov	5.16145	5.99396	9.82128
1999	Dec	5.08979	6.02102	9.72614
2000	Jan	4.90816	6.03069	8.43498
2000	Feb	5.75497	6.01372	4.65014
2000	Mar	5.2799	5.97126	6.63213
2000	Apr	4.91522	5.95324	10.8829
2000	May	4.87223	5.95324	11.2937
2000	Jun	4.96187	6.04025	11.7002
2000	Jul	4.98646	6.04737	12.018
2000	Aug	4.99119	6.03309	11.9482
2000	Sep	4.94282	6.03787	11.4245
2000	Oct	4.96809	6.02587	11.3674
2000	Nov	5.01142	6.02345	10.4379
2000	Dec	4.91027	6.13773	8.99022
2001	Jan	5.86574	6.17379	3.79549
2001	Feb	5.49408	6.13988	5.4566
2001	Mar	5.38042	6.09357	5.98996
2001	Apr	4.93337	6.07764	10.3391
2001	May	4.86109	6.08222	11.1738
2001	Jun	4.91074	6.12468	11.643
2001	Jul	4.87839	6.17794	11.995
2001	Aug	4.88579	6.23048	11.9072
2001	Sep	4.86848	6.22851	11.6492
2001	Oct	4.87121	6.23245	11.5884
2001	Nov	4.95546	6.29711	9.9468
2001	Dec	4.99733	6.35089	9.8406
2002	Jan	5.05176	6.37161	8.97263
2002	Feb	5.80756	6.38012	4.66908
2002	Mar	5.2886	6.38519	6.4599
2002	Apr	4.4867	6.41182	10.5813
2002	May	4.56945	6.43775	11.2701
2002	Jun	4.5729	6.44731	11.7385
2002	Jul	4.55109	6.42811	12.094
2002	Aug	4.62597	6.42487	11.8853
2002	Sep	4.68066	6.42162	11.4711
2002	Oct	4.70467	6.40688	11.4184
2002	Nov	4.92781	6.38519	9.64498
2002	Dec	5.00936	6.37673	9.81141
2003	Jan	4.27524	6.40853	8.82201
2003	Feb	5.46458	6.38012	4.81786
2003	Mar	5.16048	6.35784	6.30262
2003	Apr	4.54416	6.35784	10.0233
2003	May	4.48628	6.40357	11.5654
2003	Jun	4.58095	6.44572	11.7755
2003	Jul	4.6298	6.42487	11.5053
2003	Aug	4.6665	6.39192	11.9037
2003	Sep	4.60087	6.39943	11.4977
2003	Oct	4.61482	6.43615	11.3151
2003	Nov	4.89	6.47389	9.79784
2003	Dec	4.37495	6.48616	9.25306
2004	Jan	5.2924	6.52503	8.37547
2004	Feb	5.2777	6.52942	3.72328
2004	Mar	5.33664	6.49677	5.89302
2004	Apr	4.70956	6.48004	9.56512
2004	May	4.6663	6.46614	11.3515
2004	Jun	4.71915	6.46925	11.5293
2004	Jul	4.66693	6.45834	11.8574
2004	Aug	4.68414	6.43615	11.8227
2004	Sep	4.61333	6.43775	11.4053
2004	Oct	4.67744	6.44413	11.1167
2004	Nov	5.05905	6.46614	9.63637
2004	Dec	5.07314	6.48311	10.0287
2005	Jan	5.29119	6.44254	8.59423
2005	Feb	5.44217	6.46264	4.32148
2005	Mar	5.28562	6.48158	6.56695
2005	Apr	5.07494	6.48425	10.1822
2005	May	4.69731	6.54103	11.5169
2005	Jun	4.60213	6.55536	11.9062
2005	Jul	4.72665	6.5903	11.3119
2005	Aug	4.62169	6.61338	11.5893
2005	Sep	4.81113	6.64509	10.5061
2005	Oct	4.68092	6.71417	10.5859
2005	Nov	4.90428	6.78106	9.50842
2005	Dec	4.90029	6.74759	8.19908
2006	Jan	5.94616	6.81344	3.7281
2006	Feb	5.87375	6.77765	4.27249
2006	Mar	5.56069	6.84375	5.7167
2006	Apr	4.47343	6.89568	10.2037
2006	May	4.70264	7.09589	10.7305
2006	Jun	4.63372	7.20042	11.4567
2006	Jul	4.63845	7.22911	11.6509
2006	Aug	5.1304	7.21303	11.7407
2006	Sep	4.60066	7.14441	11.6221
2006	Oct	4.7834	7.11396	10.86
2006	Nov	4.90601	7.1285	8.89648
2006	Dec	4.89	7.13569	9.47751
2007	Jan	5.45861	7.11802	3.54962
2007	Feb	5.524	7.1325	4.16511
2007	Mar	5.22082	7.1452	6.84599
2007	Apr	4.97688	7.16162	9.56427
2007	May	4.94296	7.14204	11.0753
2007	Jun	4.97869	7.11233	11.742
2007	Jul	4.92281	7.09174	11.904
2007	Aug	4.89557	6.99118	11.8481
2007	Sep	4.90411	6.98379	11.1773
2007	Oct	4.89038	6.97354	11.036
2007	Nov	4.91233	6.97448	9.30622
2007	Dec	4.91275	6.9921	7.85485
2008	Jan	5.40736	7.00579	4.10759
2008	Feb	5.44978	7.01571	4.18052
2008	Mar	5.18561	7.05704	6.15401
2008	Apr	4.93161	7.06305	10.3381
2008	May	4.99944	7.07918	10.9387
2008	Jun	4.95795	7.09091	11.7506
2008	Jul	4.92105	7.11639	11.8157
2008	Aug	5.10594	7.08003	11.6895
2008	Sep	5.05924	7.06732	10.9351
2008	Oct	5.06296	6.9575	11.2046
2008	Nov	4.91699	6.89061	8.80145
2008	Dec	4.89495	6.94312	8.28491
2009	Jan	5.37493	6.91672	3.68888
2009	Feb	5.36827	6.90875	6.31554
2009	Mar	5.1901	6.93731	6.81542
2009	Apr	4.9065	6.94698	9.27492
2009	May	4.86377	7.00579	11.3197
2009	Jun	4.96306	7.04665	11.6429
2009	Jul	5.0127	7.09589	11.7085
2009	Aug	4.96704	7.14835	11.7661
2009	Sep	4.83675	7.20638	11.6478
2009	Oct	5.06891	7.26333	10.9892
2009	Nov	5.06238	7.33041	8.48059
2009	Dec	5.08094	7.40914	6.72779
2010	Jan	5.45856	7.42714	4.66438
2010	Feb	5.33647	7.39449	3.88362
2010	Mar	4.80581	7.42178	6.72371
2010	Apr	5.06022	7.53583	9.94696
2010	May	5.01048	7.50714	11.3025
2010	Jun	5.22081	7.46566	11.5876
2010	Jul	5.19783	7.44717	10.8587
2010	Aug	5.10685	7.39572	11.6405
2010	Sep	4.99574	7.4055	11.362
2010	Oct	4.99387	7.44425	11.4811
2010	Nov	5.17789	7.38337	9.03383
2010	Dec	5.17823	7.32647	8.22188
2011	Jan	5.34411	7.39695	7.10661
2011	Feb	5.3104	7.49165	5.6685
2011	Mar	5.22347	7.49332	6.16752
2011	Apr	5.23502	7.48212	9.98827
2011	May	5.05394	7.3908	11.5741
2011	Jun	4.98734	7.34407	12.1139
2011	Jul	5.03199	7.30653	12.0616
2011	Aug	4.99882	7.26892	12.0158
2011	Sep	5.0977	7.21008	11.6609
2011	Oct	5.03218	7.2145	11.2404
2011	Nov	5.24497	7.19968	9.55131
2011	Dec	5.1679	7.17702	8.40225
2012	Jan	5.67655	7.17549	3.16548
2012	Feb	5.2247	7.16395	5.14691
2012	Mar	5.24013	7.17012	7.13537
2012	Apr	5.06701	7.23201	9.43138
2012	May	5.32897	7.2998	11.4555
2012	Jun	5.16571	7.36581	11.9248
2012	Jul	5.09243	7.41337	11.9735
2012	Aug	5.12209	7.43662	11.7548
2012	Sep	5.1463	7.42357	11.4324
2012	Oct	5.15092	7.3994	11.3535
2012	Nov	5.25512	7.50219	7.46543
2012	Dec	5.47657	7.53903	5.16078
2013	Jan	5.60701	7.55956	5.83188
2013	Feb	5.98423	7.54115	3.36038
2013	Mar	4.99292	7.49721	5.83276
2013	Apr	5.03887	7.52132	8.55972
2013	May	5.31481	7.50439	11.3252
2013	Jun	5.45885	7.49554	11.383
2013	Jul	5.34287	7.45356	11.584
2013	Aug	5.37695	7.446	11.5834
2013	Sep	5.29379	7.41397	11.5027
2013	Oct	5.1698	7.4061	11.5092
2013	Nov	5.23329	7.37776	9.79785
2013	Dec	5.5747	7.34794	5.43634
2014	Jan	6.20707	7.33368	2.89591
2014	Feb	5.95758	7.355	3.76815
2014	Mar	5.09124	7.41035	6.62446
2014	Apr	5.11728	7.41337	8.54269
2014	May	5.37401	7.41231	11.2375
2014	Jun	5.42987	7.47591	11.4136
2014	Jul	5.23616	7.49887	11.6751
2014	Aug	5.22236	7.48043	11.5187
2014	Sep	5.33998	7.45182	11.336
2014	Oct	5.37291	7.43189	11.2442
2014	Nov	5.2004	7.51534	8.03958
2014	Dec	5.18293	7.52402	8.44025
2015	Jan	5.78895	7.49109	7.26578
2015	Feb	5.97673	7.44717	1.66771
2015	Mar	5.05775	7.39634	6.82828
2015	Apr	5.60869	7.33889	10.0895
2015	May	5.51984	7.32975	11.3794
2015	Jun	5.50647	7.31721	11.8884
2015	Jul	5.51514	7.29029	11.9432
2015	Aug	5.47138	7.29234	11.6766
2015	Sep	5.45294	7.2998	11.7129
2015	Oct	5.44713	7.33368	11.3161
2015	Nov	5.20485	7.33759	8.44915
2015	Dec	5.54655	7.31522	5.02651
2016	Jan	5.46797	7.29709	4.7023
2016	Feb	5.98194	7.29438	6.15571
2016	Mar	5.35189	7.27794	6.78559
2016	Apr	5.64526	7.29845	7.33811
2016	May	5.54518	7.32235	10.058
2016	Jun	5.42706	7.36897	10.7705
2016	Jul	5.27704	7.34601	10.3574
2016	Aug	5.27815	7.36138	10.4729
2016	Sep	5.26534	7.33629	9.32276
2016	Oct	5.23073	7.31122	9.17233
2016	Nov	5.18721	7.28824	9.38429
2016	Dec	5.18392	7.26052	8.49265
